# Supplementary material for: Graphitized porous carbon microspheres assembled with carbon black nanoparticles as improved anode materials in Li-ion batteries
Source: Royal Society of Chemistry journal article supplement (doi:10.1039/c4ta00356j), 2014-01-01
Supplement: c4ta00356j1.pdf [file c4ta00356j1.pdf]

## Supporting information

### **Graphitized porous carbon microspheres assembled with carbon black nanoparticles as improved anode materials in Li-ion batteries**

Lei Zhang,<sup>ab</sup> Meiju Zhang,<sup>b</sup> Yanhong Wang,<sup>\*b</sup> Zailei Zhang,<sup>b</sup>

Guangwei Kan,<sup>b</sup> Cunguo Wang,<sup>\*a</sup> Ziyi Zhong,<sup>c</sup> and Fabin Su<sup>\*b</sup>

*<sup>a</sup> Key Laboratory of Rubber-plastics, Ministry of Education, Qingdao University of Science and Technology, Qingdao 261500, China,*

*<sup>b</sup> State Key Laboratory of Multiphase Complex Systems, Institute of Process Engineering, Chinese Academy of Sciences, Beijing 100190, China*

*<sup>c</sup> Institute of Chemical Engineering and Sciences, A\*star, 1 Pesek Road, Jurong Island, Singapore 627833*

\*To whom correspondence should be addressed. E-mail address: wangyanhong@mail.ipe.ac.cn (Y. Wang), cunquow@yahoo.com (C. Wang), fbsu@ipe.ac.cn (F. Su), Tel.: +86-10-82544850, Fax: +86-10-82544851.

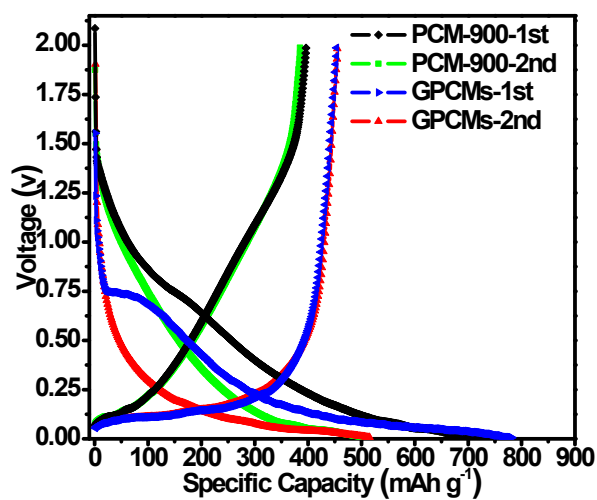

**Fig. S1** The initial and second discharge-charge curves of PCM-900 and GPCMs.

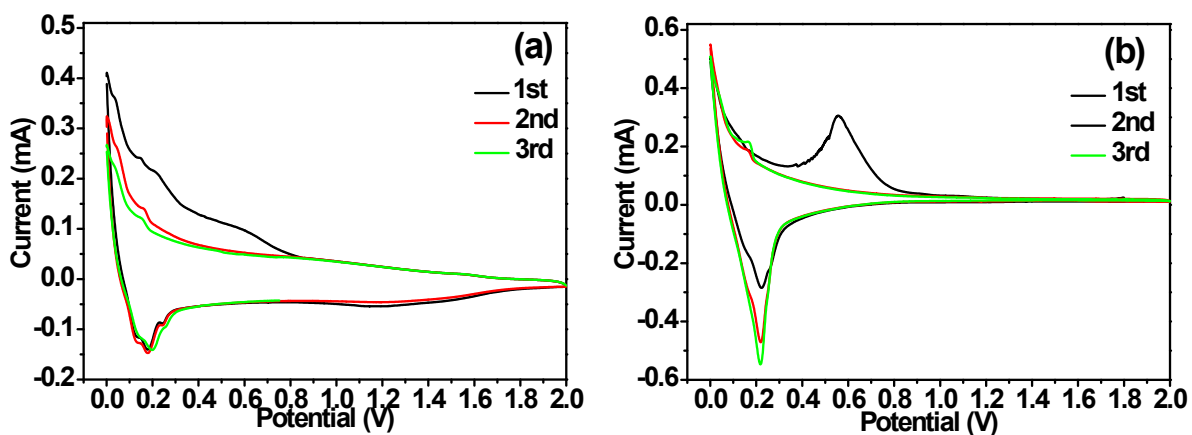

**Fig. S2** The cyclic voltammogram curves of PCM-900 (a) and GPCMs (b).
